# Supplementary material for: Understanding the Mode of Action of a Micro-Immunotherapy Formulation: Pre-Clinical Evidence from the Study of 2LEBV® Active Ingredients
Source: MDPI journal article supplement (doi:10.3390/life14010102), 2024-01-09
Supplement: s1 [file s1]

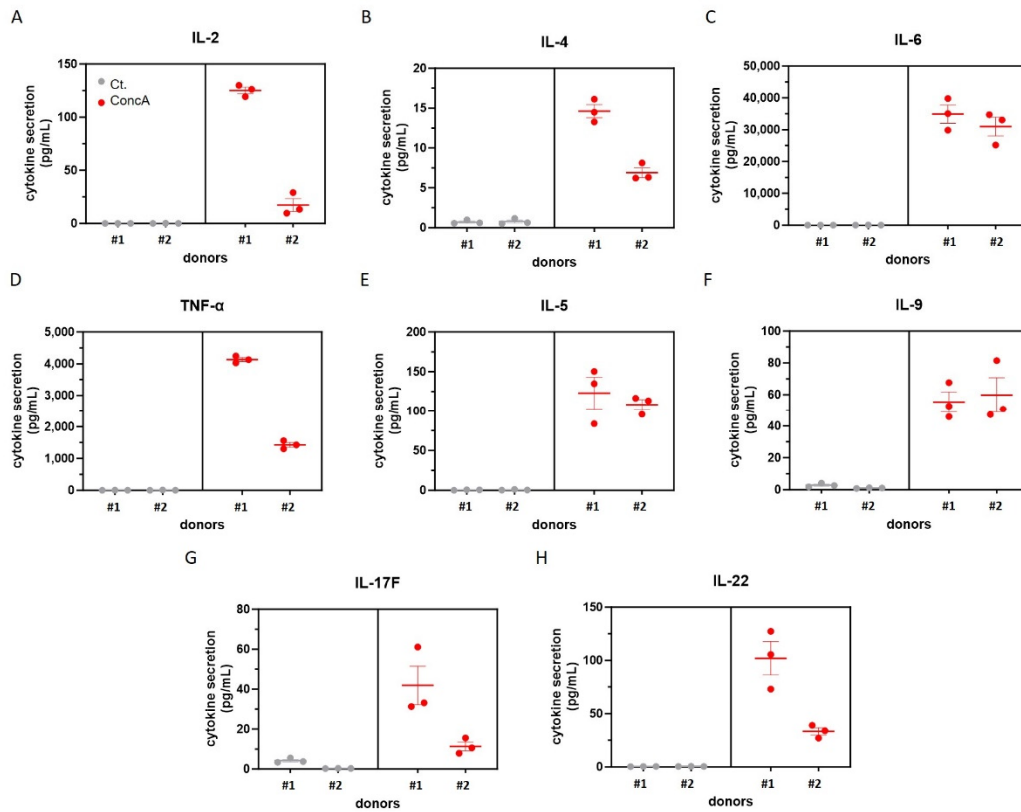

**Supplementary Figure S1.** Concanavalin A induces the secretion of a panel of cytokines when compared with the control unstimulated conditions, in a model of human PBMCs. PBMCs from two donors (#1 and #2) were retrieved and left untreated (control, Ct., grey dots) or were stimulated for 48 hours with 5  $\mu$ g/mL ConcA (ConcA, red dots). (A-H) For each donor, the secretion of IL-2, IL-4, IL-6, TNF- $\alpha$ , IL-5, IL-9, IL-17F, and IL-22 was appraised in the SN, by ELISA assay. The results are expressed as the mean  $\pm$  S.E.M. of  $n = 3$  measures for each donor.

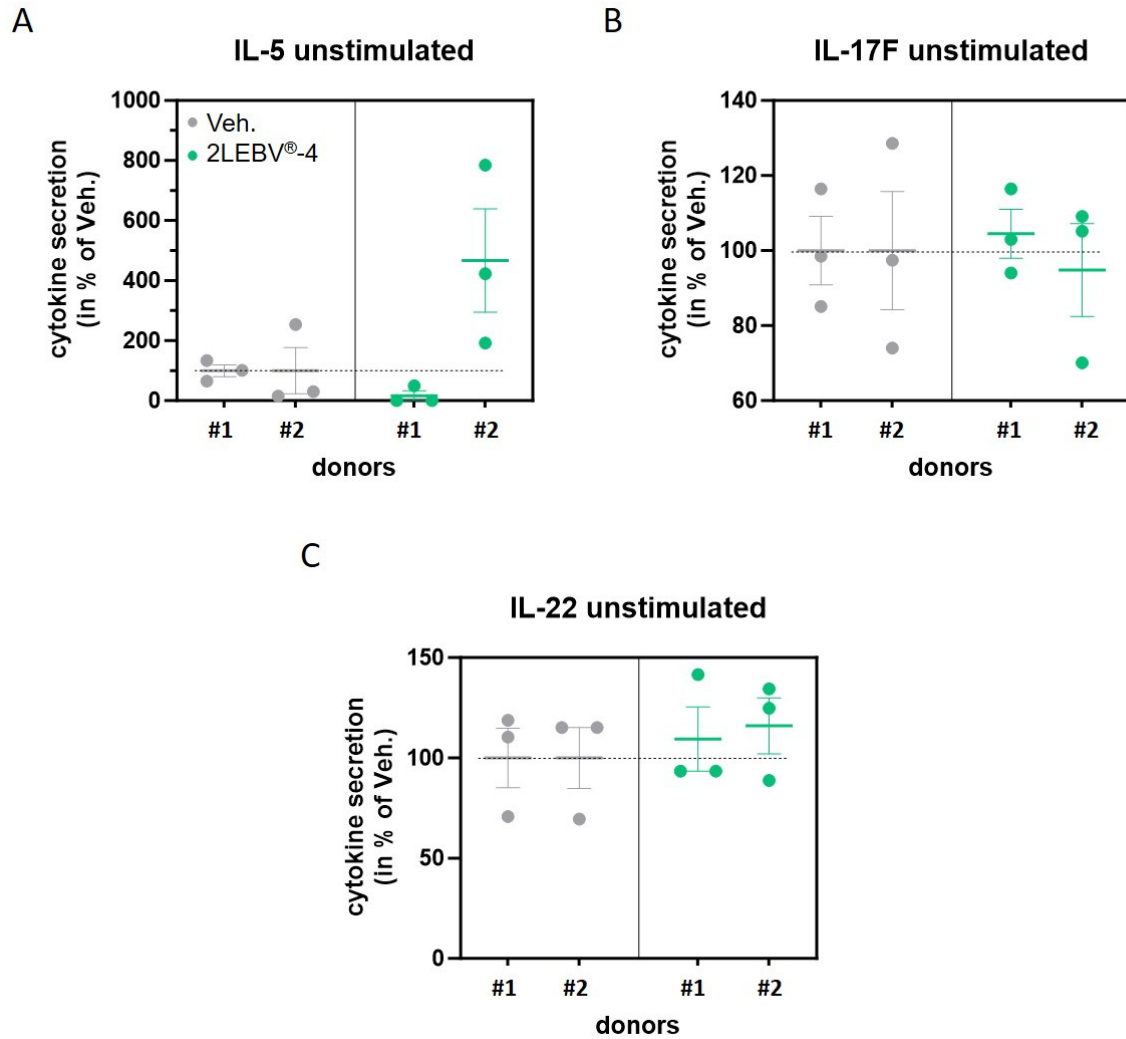

**Supplementary Figure S2.** 2LEBV<sup>®</sup>-4 modulates the secretion of several cytokines in unstimulated human PBMCs. PBMCs from two donors (#1 and #2), were retrieved and incubated for 48 hours in the presence of either the Veh. (grey dots), or 2LEBV<sup>®</sup>-4 (green dots), in normal unstimulated culture conditions. Thus, ELISA assay appraised the secretion of IL-5, IL-17F and IL-22 in the SN. The results are presented as the mean  $\pm$  S.E.M. of  $n = 3$  measures for each donor and expressed as a percentage of the values obtained in the Veh.-treated conditions (set as 100%). The dotted lines are drawn to highlight the effect of 2LEBV<sup>®</sup>-4 compared with the Veh.

**Supplementary Table S1:** Effect of 2LEBV<sup>®</sup>-4 on cytokine secretion, appraised in unstimulated or in concanavalin A (Con-A)-stimulated human peripheral blood mononuclear cells (PBMCs).

| Cytokines     | Stimulatory (↑) or inhibitory (↓) effects of 2LEBV <sup>®</sup> -4 on: |                        |
|---------------|------------------------------------------------------------------------|------------------------|
|               | unstimulated PBMCs                                                     | Con-A stimulated PBMCs |
| IL-4          | ↑                                                                      | ↑                      |
| IL-5          | -                                                                      | ↓                      |
| IL-6          | ↑                                                                      | ↑                      |
| IL-9          | ↓                                                                      | ↓                      |
| IL-17F        | -                                                                      | ↓                      |
| IL-22         | -                                                                      | ↓                      |
| TNF- $\alpha$ | ↑                                                                      | ↑                      |

Con-A: concanavalin A; IL: interleukin; PBMCs: peripheral blood mononuclear cells; TNF- $\alpha$ : tumor necrosis factor  $\alpha$ .
